# Supplementary material
Source: MDPI journal article supplement (https://www.mdpi.com/1999-4907/13/5/674)
Supplement: s1 [file s1]

**Supplementary data:**

Table S1. Measurements of various taxonomic characters and indices for *O. parvidens* of district Buner during, 2016-19.

| S. no. | Parameters                                                 | O-R<br>(min-Max) | Range in<br>literature | Mean | SD   | SE   | CV    |
|--------|------------------------------------------------------------|------------------|------------------------|------|------|------|-------|
| 1      | Length of left mandible from the base                      | 1.19-1.4         | 1.19-1.38              | 1.29 | 0.06 | 0.02 | 4.64  |
| 2      | Length of tooth to apical tip                              | 0.75-0.89        | 0.70-0.90              | 0.83 | 0.04 | 0.01 | 4.50  |
| 3      | Length of head to side base of<br>mandible                 | 2.2-2.89         | 1.89-2.70              | 2.54 | 0.18 | 0.05 | 7.26  |
| 4      | Max. Length of head with mandible                          | 3.49-4.2         | -                      | 3.84 | 0.21 | 0.06 | 5.39  |
| 5      | Head width max                                             | 1.28-2.26        | 1.45-2.15              | 1.98 | 0.22 | 0.06 | 11.01 |
| 6      | Width of pronotum                                          | 1.34-1.7         | 1.05-1.65              | 1.51 | 0.13 | 0.04 | 8.67  |
| 7      | Length of pronotum                                         | 0.59-0.93        | 0.60-0.93              | 0.80 | 0.08 | 0.02 | 10.00 |
| 8      | Postmentum max width                                       | 0.66-0.9         | 0.62-0.90              | 0.82 | 0.05 | 0.01 | 6.48  |
| 9      | Postmentum min length                                      | 1.28-1.89        | 1.15-1.70              | 1.57 | 0.19 | 0.05 | 12.44 |
| 10     | Total body length                                          | 0-0              | 5.30 -7.45             | 0.00 | 0.00 | 0.00 | 0     |
| 11     | Mandible Head Index (Length of<br>mandible/length of head) | 0.45-0.51        | 0.50-0.60              | 0.51 | 0.04 | 0.01 | 7.56  |
| 12     | Index tooth distance/mandible length                       | 0.62-0.67        | 0.58-0.65              | 0.64 | 0.03 | 0.01 | 4.49  |

Table S2. Measurements of various taxonomic characters and indices for *O. parvidens* of district Swabi during, 2016-19.

| S. No. | Parameters                                               | O-R(min-Max) | Range in literature | Mean | SD   | SE   | CV    |
|--------|----------------------------------------------------------|--------------|---------------------|------|------|------|-------|
| 1      | Length of left mandible from the base                    | 1.19-1.4     | 1.19-1.38           | 1.29 | 0.08 | 0.02 | 6.50  |
| 2      | Length of tooth to apical tip                            | 0.8-0.89     | 0.70-0.90           | 0.83 | 0.03 | 0.01 | 3.66  |
| 3      | Length of head to side base of mandible                  | 2.35-2.61    | 1.89-2.70           | 2.49 | 0.08 | 0.02 | 3.60  |
| 4      | Max. Length of head with mandible                        | 3.54-3.99    | -                   | 3.79 | 0.13 | 0.03 | 3.62  |
| 5      | Head width max                                           | 1.8-2.26     | 1.45-2.15           | 2.02 | 0.17 | 0.04 | 8.62  |
| 6      | Width of pronotum                                        | 1.34-1.69    | 1.05-1.65           | 1.45 | 0.13 | 0.03 | 9.42  |
| 7      | Length of pronotum                                       | 0.65-0.93    | 0.60-0.93           | 0.81 | 0.08 | 0.02 | 10.41 |
| 8      | Postmentum max width                                     | 0.77-0.88    | 0.62-0.90           | 0.81 | 0.03 | 0.01 | 3.99  |
| 9      | Postmentum min length                                    | 1.28-1.65    | 1.15-1.70           | 1.49 | 0.15 | 0.04 | 10.61 |
| 10     | Total body length                                        | 0-0          | 5.30 -7.45          | 0    | 0    | 0    | 0     |
| 11     | Mandible Head Index (Length of mandible/ length of head) | 0.45-0.51    | 0.50-0.60           | 0.51 | 0.03 | 0.01 | 6.47  |
| 12     | Tooth index (tooth distance to tip/mandible Length)      | 0.65-0.67    | 0.58-0.65           | 0.64 | 0.03 | 0.01 | 5.42  |

Table S3. Measurements of various taxonomic characters and indices for *O. obesus* of district Buner during, 2016-19.

| S. No. | Parameters                                                           | O-R<br>(min-max) | Range in<br>literature | Mean | SD   | SE   | CV    |
|--------|----------------------------------------------------------------------|------------------|------------------------|------|------|------|-------|
| 1      | Number of Antennal segments                                          | 16-17            | 16-17                  |      |      |      |       |
| 2      | Max. Length of left mandible<br>from the base                        | 0.69-0.9         | 0.75-1.03              | 0.81 | 0.07 | 0.03 | 8.09  |
| 3      | Length of tooth to apical tip                                        | 0.14-0.35        | 0.25-0.38              | 0.26 | 0.06 | 0.03 | 24.22 |
| 4      | Length of head to side base of<br>mandible                           | 1.18-1.59        | 1.03-1.67              | 1.36 | 0.12 | 0.06 | 9.17  |
| 5      | Max. Length of head with<br>mandible                                 | 1.91-2.37        | -                      | 2.16 | 0.18 | 0.08 | 8.13  |
| 6      | Min head width                                                       | 0.56-0.92        | -                      | 0.76 | 0.08 | 0.04 | 10.99 |
| 7      | Max head width                                                       | 1.05-1.36        | 0.95-1.37              | 1.21 | 0.10 | 0.05 | 8.65  |
| 8      | Width of pronotum                                                    | 0.88-1.1         | 0.80-1.07              | 1.00 | 0.08 | 0.03 | 7.79  |
| 9      | Length of pronotum                                                   | 0.52-0.66        | 0.50-0.65              | 0.59 | 0.05 | 0.02 | 7.95  |
| 10     | Postmentum width                                                     | 0.48-0.62        | 0.50-0.58              | 0.57 | 0.04 | 0.02 | 7.75  |
| 11     | Postmentum length                                                    | 0.7-1.05         | 0.70-0.93              | 0.94 | 0.09 | 0.04 | 9.99  |
| 12     | Total body length                                                    | 0-0              | 4.0-6.0                | 0    | 0    | 0    | 0     |
| 13     | Head Index (Width/Length)                                            | 0.80-0.95        | 0.82-0.95              | 0.89 | 0.06 | 0.03 | 6.27  |
| 14     | Mandible Head Index (Length<br>of mandible/<br>length of head)       | 0.48-0.63        | 0.59-0.68              | 0.59 | 0.06 | 0.03 | 10.11 |
| 15     | Head-convergence index (min.<br>width of head/max. width of<br>head) | 0.53-0.71        | 0.62-0.70              | 0.65 | 0.08 | 0.04 | 13.15 |
| 16     | Index tooth-distance/mandible-<br>Length                             | 0.24-0.39        | 0.31-0.40              | 0.31 | 0.06 | 0.03 | 18.84 |

Table S4. Measurements of various taxonomic characters and indices for *O. obesus* of district Haripur during, 2016-19.

| S. No. | Parameters                                                     | O-R<br>(min-max) | Literature<br>range | Mean | SD   | SE   | CV    |
|--------|----------------------------------------------------------------|------------------|---------------------|------|------|------|-------|
| 1      | Number of Antennal segments                                    | 16-17            | 16-17               |      |      |      |       |
| 2      | Max. Length of left mandible from the base                     | 0.65-1.02        | 0.75-1.03           | 0.82 | 0.12 | 0.05 | 14.40 |
| 3      | Length of tooth to apical tip                                  | 0.21-0.38        | 0.25-0.38           | 0.30 | 0.06 | 0.03 | 18.94 |
| 4      | Length of head to side base of mandible                        | 1.18-1.5         | 1.03-1.67           | 1.33 | 0.09 | 0.04 | 7.10  |
| 5      | Max. Length of head with mandible                              | 1.89-2.49        | -                   | 2.15 | 0.20 | 0.09 | 9.44  |
| 6      | Min. head width                                                | 0.65-0.91        | -                   | 0.80 | 0.07 | 0.03 | 9.14  |
| 7      | Max. head width                                                | 1-1.35           | 0.95-1.37           | 1.20 | 0.10 | 0.04 | 8.09  |
| 8      | Width of pronotum                                              | 0.8-1.35         | 0.80-1.07           | 0.93 | 0.11 | 0.05 | 11.60 |
| 9      | Length of pronotum                                             | 0.5-0.7          | 0.50-0.65           | 0.58 | 0.05 | 0.02 | 9.18  |
| 10     | Postmentum width                                               | 0.49-0.69        | 0.50-0.58           | 0.58 | 0.05 | 0.02 | 8.83  |
| 11     | Postmentum length                                              | 0.81-0.91        | 0.70-0.93           | 0.87 | 0.03 | 0.01 | 3.36  |
| 12     | Total body length                                              | 0-0              | 4.0-6.0             | 0.00 | 0.00 | 0.00 | 0.00  |
| 13     | Head Index (Width/Length)                                      | 0.67-1.083       | 0.82-0.95           | 0.91 | 0.10 | 0.05 | 11.31 |
| 14     | Mandible Head Index (Length of mandible/ length of head)       | 0.50-0.73        | 0.59-0.68           | 0.62 | 0.06 | 0.03 | 9.57  |
| 15     | Head-convergence index (min. width of head/max. width of head) | 0.52-0.9         | 0.62-0.70           | 0.67 | 0.10 | 0.04 | 14.28 |
| 16     | Index tooth-distance/mandible-length                           | 0.25-0.55        | 0.31-0.40           | 0.36 | 0.05 | 0.02 | 14.79 |

Table S5. Measurements of various taxonomic characters and indices for *O. obesus* of district Swabi during, 2016-19.

| S. No. | Measurements                                                            | O-R<br>(min-max) | Range in<br>literature | Mean  | SD    | SE    | CV     |
|--------|-------------------------------------------------------------------------|------------------|------------------------|-------|-------|-------|--------|
| 1      | No. antennal segments                                                   | 16-17            | 16-17                  |       |       |       |        |
| 2      | Max Length of left mandible from the base                               | 0.7-1.02         | 0.75-1.03              | 0.854 | 0.103 | 0.046 | 12.070 |
| 3      | Length of tooth to apical tip                                           | 0.18-0.38        | 0.25-0.38              | 0.305 | 0.060 | 0.027 | 19.567 |
| 4      | Length of head to side base of mandible                                 | 1.22-1.56        | 1.03-1.67              | 1.381 | 0.082 | 0.037 | 5.956  |
| 5      | Maxi Length of head with mandible                                       | 1.98-2.47        | -                      | 2.235 | 0.158 | 0.071 | 7.073  |
| 6      | Min head width                                                          | 0.68-0.9         | -                      | 0.825 | 0.068 | 0.030 | 8.190  |
| 7      | Max head width                                                          | 1.05-1.31        | 0.95-1.37              | 1.195 | 0.091 | 0.041 | 7.658  |
| 8      | Width of pronotum                                                       | 0.83-1.07        | 0.80-1.07              | 0.948 | 0.063 | 0.028 | 6.638  |
| 9      | Length of pronotum                                                      | 0.5-0.66         | 0.50-0.65              | 0.573 | 0.050 | 0.023 | 8.817  |
| 10     | Postmentum width                                                        | 0.48-0.62        | 0.50-0.58              | 0.560 | 0.039 | 0.018 | 7.047  |
| 11     | Postmentum length                                                       | 0.86-1           | 0.70-0.93              | 0.910 | 0.038 | 0.017 | 4.215  |
| 12     | Total body length                                                       | 0-0              | 4.0-6.0                | 0     | 0     | 0     | 0      |
| 13     | Head index<br>(width/length)                                            | 0.86-0.93        | 0.82-0.95              | 0.897 | 0.033 | 0.015 | 3.706  |
| 14     | Mandible Head Index<br>(Length of mandible/<br>length of head)          | 0.50-0.76        | 0.59-0.68              | 0.657 | 0.133 | 0.060 | 20.279 |
| 15     | Head-convergence<br>index (min. Width of<br>head/max. Width of<br>head) | 0.65-0.74        | 0.62-0.70              | 0.692 | 0.047 | 0.021 | 6.737  |
| 16     | Index tooth-<br>distance/mandible-<br>length                            | 0.28-0.35        | 0.31-0.40              | 0.329 | 0.041 | 0.018 | 12.541 |

Table S6. Measurements of various taxonomic characters and indices for *O. horai* of district Haripur during, 2016-19.

| S. no. | Parameters                                              | O-R<br>(min-Max) | Range in<br>literature | Mean  | SD    | SE    | CV    |
|--------|---------------------------------------------------------|------------------|------------------------|-------|-------|-------|-------|
| 1      | Number of Antennal segments                             | 15-16            | 15-16                  |       |       |       |       |
| 2      | Length of left mandible from the base                   | 1-1.3            | 1.05-1.23              | 1.168 | 0.119 | 0.053 | 10.17 |
| 3      | Length of tooth to apical tip                           | 0.6-0.8          | -                      | 0.72  | 0.084 | 0.037 | 11.62 |
| 4      | Length of head to side base of mandible                 | 1.7-1.9          | 1.65-2.00              | 1.83  | 0.082 | 0.037 | 4.51  |
| 5      | Head width max                                          | 1.35-1.55        | 1.28-1.65              | 1.47  | 0.076 | 0.034 | 5.16  |
| 6      | Width of pronotum                                       | 0.85-1.2         | 0.90-1.25              | 1.03  | 0.164 | 0.073 | 15.95 |
| 7      | Length of pronotum                                      | 0.6-0.7          | 0.55-0.75              | 0.666 | 0.042 | 0.019 | 6.33  |
| 8      | Postmentum max width                                    | 0.55-0.66        | 0.53-0.70              | 0.612 | 0.044 | 0.020 | 7.25  |
| 9      | Postmentum length                                       | 1.2-1.4          | 1.13-1.38              | 1.31  | 0.074 | 0.033 | 5.66  |
| 10     | Width of labrum                                         | 0.27-0.29        | 0.26-0.33              | 0.282 | 0.008 | 0.004 | 2.97  |
| 11     | Total body length                                       | 5-6              | 4.85-6.80              | 5.52  | 0.432 | 0.193 | 7.83  |
| 12     | Head Index (Width/Length)                               | 0.56-0.76        | 0.74-0.89              | 0.64  | 0.082 | 0.037 | 12.76 |
| 13     | Mandible Head Index (Length of mandible/length of head) | 0.55-0.76        | 0.55-0.65              | 0.64  | 0.082 | 0.037 | 12.76 |
| 14     | Index tooth distance/mandible length                    | 0.54-0.7         | 0.60-0.66              | 0.62  | 0.059 | 0.026 | 9.55  |

Table S7. Measurements of various taxonomic characters and indices for *O. assmuthi* of district Buner during, 2016-19.

| S. No. | Parameters                                                           | O-R<br>(min-Max) | Range in<br>literature | Mean | SD   | SE   | CV    |
|--------|----------------------------------------------------------------------|------------------|------------------------|------|------|------|-------|
| 1      | Number of Antennal segments                                          | 16-16            | 16                     |      |      |      |       |
| 2      | Max. Length of left mandible<br>from the base                        | 0.82-0.94        | 0.77-0.95              | 0.87 | 0.05 | 0.02 | 5.82  |
| 3      | Length of tooth to apical tip                                        | 0.28-0.33        | 0.28-0.35              | 0.30 | 0.02 | 0.01 | 5.90  |
| 4      | Length of head to side base of<br>mandible                           | 1.57-1.7         | 1.44-1.70              | 1.65 | 0.05 | 0.02 | 2.94  |
| 5      | Max. Length of head with<br>mandible                                 | 2.45-2.57        | -                      | 2.51 | 0.04 | 0.02 | 1.52  |
| 6      | Min. head width                                                      | 0.87-0.92        | 0.78-0.98              | 0.90 | 0.02 | 0.01 | 1.84  |
| 7      | Max. head width                                                      | 1.22-1.43        | 1.07-1.35              | 1.32 | 0.07 | 0.03 | 5.28  |
| 8      | Width of pronotum                                                    | 0.9-1            | 0.75-0.95              | 0.95 | 0.04 | 0.02 | 4.31  |
| 9      | Length of pronotum                                                   | 0.53-0.73        | 0.48-0.58              | 0.61 | 0.07 | 0.03 | 11.36 |
| 10     | Postmentum width                                                     | 0.48-0.58        | 0.45-0.60              | 0.53 | 0.04 | 0.02 | 7.08  |
| 11     | Postmentum length                                                    | 0.89-1.2         | 0.94-1.25              | 1.02 | 0.11 | 0.05 | 10.98 |
| 12     | Length of labrum                                                     | 0.3-0.34         | 0.35                   | 0.32 | 0.02 | 0.01 | 5.03  |
| 13     | Width of labrum                                                      | 0.31-0.35        | 0.3                    | 0.33 | 0.02 | 0.01 | 5.07  |
| 14     | Total body length                                                    | 0-0              | 4.5-6.5                | 0.00 | 0.00 | 0.00 | 0.00  |
| 15     | Mandible Head Index (Length<br>of mandible/ length of head)          | 0.48-0.59        | 0.51-0.57              | 0.53 | 0.04 | 0.02 | 8.27  |
| 16     | Head-convergence index (min.<br>width of head/max. width of<br>head) | 0.62-0.72        | 0.68-0.78              | 0.68 | 0.04 | 0.02 | 5.57  |
| 17     | Index tooth distance/mandible-<br>length                             | 0.31-0.35        | 0.33-0.37              | 0.34 | 0.02 | 0.01 | 4.49  |

Table S8. Measurements of various taxonomic characters and indices for *O. assmuthi* of district Haripur during, 2016-19.

| S. No. | Parameters                                                     | O-R (min-Max) | Literature range | Mean | SD   | SE   | CV   |
|--------|----------------------------------------------------------------|---------------|------------------|------|------|------|------|
| 1      | Number of Antennal segments                                    | 15-16         | 16               |      |      |      |      |
| 2      | Max. Length of left mandible from the base                     | 0.82-0.94     | 0.77-0.95        | 0.88 | 0.04 | 0.02 | 4.40 |
| 3      | Length of tooth to apical tip                                  | 0.27-0.35     | 0.28-0.35        | 0.31 | 0.03 | 0.01 | 9.25 |
| 4      | Length of head to side base of mandible                        | 1.5-1.7       | 1.44-1.70        | 1.64 | 0.06 | 0.03 | 3.63 |
| 5      | Max. Length of head with mandible                              | 2.4-2.59      | -                | 2.52 | 0.06 | 0.03 | 2.28 |
| 6      | Min. head width                                                | 0.81-0.96     | 0.78-0.98        | 0.88 | 0.05 | 0.02 | 5.85 |
| 7      | Max. head width                                                | 1.2-1.36      | 1.07-1.35        | 1.29 | 0.05 | 0.02 | 4.16 |
| 8      | Width of pronotum                                              | 0.89-1        | 0.75-0.95        | 0.93 | 0.04 | 0.02 | 4.15 |
| 9      | Length of pronotum                                             | 0.45-0.63     | 0.48-0.58        | 0.55 | 0.05 | 0.02 | 9.00 |
| 10     | Postmentum width                                               | 0.5-0.6       | 0.45-0.60        | 0.55 | 0.03 | 0.01 | 5.43 |
| 11     | Postmentum length                                              | 0.89-1.1      | 0.94-1.25        | 0.98 | 0.07 | 0.03 | 6.85 |
| 12     | Length of labrum                                               | 0.31-0.35     | 0.35             | 0.33 | 0.02 | 0.01 | 4.55 |
| 13     | Width of labrum                                                | 0.29-0.33     | 0.3              | 0.31 | 0.01 | 0.00 | 3.62 |
| 14     | Total body length                                              | 0-0           | 4.5-6.5          | 0.00 | 0.00 | 0.00 | 0.00 |
| 15     | Mandible Head Index (Length of mandible/length of head)        | 0.48-0.6      | 0.51-0.57        | 0.54 | 0.04 | 0.02 | 6.84 |
| 16     | Head-convergence index (min. width of head/max. width of head) | 0.61-0.75     | 0.68-0.78        | 0.68 | 0.04 | 0.02 | 5.87 |
| 17     | Index tooth distance/mandible length                           | 0.31-0.4      | 0.33-0.37        | 0.36 | 0.03 | 0.01 | 7.94 |



Table S9. Measurements of various taxonomic characters and indices for *O. assmuthi* of district Swabi during, 2016-19.

| S. No. | Parameters                                                           | O-R<br>(min-Max) | Range in<br>literature | Mean | SD   | SE   | CV    |
|--------|----------------------------------------------------------------------|------------------|------------------------|------|------|------|-------|
| 1      | Number of Antennal segments                                          | 15-16            | 16                     |      |      |      |       |
| 2      | Max Length of left mandible from the base                            | 0.82-0.91        | 0.77-0.95              | 0.86 | 0.03 | 0.02 | 3.97  |
| 3      | Length of tooth to apical tip                                        | 0.27-0.34        | 0.28-0.35              | 0.30 | 0.03 | 0.01 | 9.43  |
| 4      | Length of head to side base of mandible                              | 1.6-1.7          | 1.44-1.70              | 1.66 | 0.04 | 0.02 | 2.49  |
| 5      | Maxi Length of head with mandible                                    | 2.45-2.58        | -                      | 2.51 | 0.04 | 0.02 | 1.77  |
| 6      | Min head width                                                       | 0.81-0.9         | 0.78-0.98              | 0.87 | 0.04 | 0.02 | 4.85  |
| 7      | Max head width                                                       | 1.2-1.35         | 1.07-1.35              | 1.26 | 0.06 | 0.03 | 5.02  |
| 8      | Width of pronotum                                                    | 0.89-1           | 0.75-0.95              | 0.94 | 0.05 | 0.02 | 5.17  |
| 9      | Length of pronotum                                                   | 0.45-0.73        | 0.48-0.58              | 0.58 | 0.10 | 0.04 | 16.82 |
| 10     | Postmentum width                                                     | 0.5-0.57         | 0.45-0.60              | 0.55 | 0.03 | 0.01 | 4.75  |
| 11     | Postmentum length                                                    | 0.89-1.05        | 0.94-1.25              | 0.96 | 0.06 | 0.03 | 6.72  |
| 12     | Max. Length of labrum                                                | 0.32-0.35        | 0.35                   | 0.33 | 0.01 | 0.01 | 3.52  |
| 13     | Min length of labrum                                                 | 0.31-0.35        | 0.3                    | 0.32 | 0.01 | 0.01 | 4.58  |
| 14     | Total body length                                                    | 0-0              | 4.5-6.5                | 0.00 | 0.00 | 0.00 | 0     |
| 15     | Mandible Head Index<br>(Length of mandible/<br>length of head)       | 0.48-0.55        | 0.51-0.57              | 0.52 | 0.03 | 0.01 | 5.29  |
| 16     | Head-convergence index<br>(min. Width of head/max.<br>Width of head) | 0.63-0.75        | 0.68-0.78              | 0.69 | 0.04 | 0.02 | 6.11  |
| 17     | Index tooth<br>distance/mandible length                              | 0.31-0.37        | 0.33-0.37              | 0.35 | 0.02 | 0.01 | 6.41  |

Table. S10 Material examined for the morphometric analysis of *O. parvidens* from the studied area during, 2016-19.

| <b>S. no.</b> | <b>District</b> | <b>X</b>  | <b>Y</b>  | <b>Host food</b> | <b>Collector</b> | <b>Date of collection</b> |
|---------------|-----------------|-----------|-----------|------------------|------------------|---------------------------|
| 1             | Buner           | 72.598288 | 34.350171 | Wood             | Maid Zaman       | 21-v-2016                 |
| 2             | Buner           | 72.507558 | 34.390687 | Wood             | Maid Zaman       | 28-viii-2017              |
| 3             | Buner           | 72.438691 | 34.376848 | Pinus            | Maid Zaman       | 03-vii-2016               |
| 4             | Buner           | 72.680997 | 34.377715 | Fig              | Maid Zaman       | 19-vii-2016               |
| 5             | Buner           | 72.698563 | 34.379714 | Pinus            | Maid Zaman       | 26-vi-2016                |
| 6             | Buner           | 72.481359 | 34.424318 | Pinus            | Maid Zaman       | 13-x-2016                 |
| 7             | Buner           | 72.483517 | 34.445389 | White mulberry   | Maid Zaman       | 20-vii-2016               |
| 8             | Buner           | 72.491862 | 34.475776 | Poplar           | Maid Zaman       | 20-ix-2016                |
| 9             | Buner           | 72.532538 | 34.467296 | Grasses          | Maid Zaman       | 20-vii-2017               |
| 10            | Buner           | 72.5197   | 34.501427 | Acacia           | Maid Zaman       | 01-ix-2017                |
| 11            | Buner           | 72.683657 | 34.608187 | Pinus            | Maid Zaman       | 02-ix-2017                |
| 12            | Buner           | 72.650092 | 34.49143  | Pinus            | Maid Zaman       | 21-viii-2017              |
| 13            | Buner           | 72.508909 | 34.662834 | Fig              | Maid Zaman       | 23-ix-2016                |
| 14            | Buner           | 72.515576 | 34.658635 | Acacia           | Maid Zaman       | 23-ix-2016                |
| 15            | Buner           | 72.451019 | 34.573227 | Paper            | Maid Zaman       | 12-ix-2017                |
| 16            | Buner           | 72.365302 | 34.435395 | Fig              | Maid Zaman       | 13-ix-2016                |
| 17            | Buner           | 72.30477  | 34.599131 | Pinus            | Maid Zaman       | 17-vii-2016               |
| 18            | Buner           | 72.505075 | 34.654007 | Wood             | Maid Zaman       | 17-vi-2016                |
| 19            | Swabi           | 72.743581 | 34.216361 | Pinus            | Maid Zaman       | 17-v-2018                 |
| 20            | Swabi           | 72.656611 | 34.258759 | Wheat            | Maid Zaman       | 17-v-2018                 |
| 21            | Swabi           | 72.474971 | 34.147844 | Acacia           | Maid Zaman       | 17-vi-2018                |
| 22            | Swabi           | 72.345849 | 34.309353 | Maize            | Maid Zaman       | 23-ix-2018                |
| 23            | Swabi           | 72.414295 | 34.312894 | Paper mulberry   | Maid Zaman       | 06-v-2018                 |

Table S11 Material examined for the morphometric analysis of *O. assmuthi* from the studied area during, 2016-19.

| <b>S. no.</b> | <b>District</b> | <b>X</b>  | <b>Y</b>  | <b>Host food</b> | <b>Collector</b> | <b>Date of collection</b> |
|---------------|-----------------|-----------|-----------|------------------|------------------|---------------------------|
| 1             | Haripur         | 72.614809 | 33.989073 | Oranges          | Maid Zaman       | 10-v-2018                 |
| 2             | Haripur         | 72.771031 | 34.037062 | Wood             | Maid Zaman       | 30-v-2018                 |
| 3             | Haripur         | 72.831308 | 34.007868 | Wheat            | Maid Zaman       | 31-v-2018                 |
| 4             | Haripur         | 72.874166 | 33.98034  | Maize            | Maid Zaman       | 01-vi-2018                |
| 5             | Haripur         | 72.941805 | 33.749294 | Pinus            | Maid Zaman       | 30-vi-2017                |
| 6             | Haripur         | 73.16339  | 33.893328 | Pinus            | Maid Zaman       | 04-vii-2018               |
| 7             | Haripur         | 73.09986  | 33.968562 | Wood             | Maid Zaman       | 20-vii-2018               |
| 8             | Haripur         | 72.956749 | 33.822599 | Grasses          | Maid Zaman       | 05-ix-2018                |
| 9             | Haripur         | 73.025299 | 34.00531  | Shrubs           | Maid Zaman       | 02-v-2017                 |
| 10            | Haripur         | 72.891057 | 33.968977 | Grasses          | Maid Zaman       | 2-vii-2017                |
| 11            | Haripur         | 72.948147 | 33.82476  | Grasses          | Maid Zaman       | 2-vii-2017                |
| 12            | Buner           | 72.687688 | 34.337327 | Wood             | Maid Zaman       | 02-viii-2016              |
| 13            | Buner           | 72.667614 | 34.61797  | Maize            | Maid Zaman       | 17-vi-2016                |
| 14            | Buner           | 72.710333 | 34.401573 | Shrubs           | Maid Zaman       | 29-v-2016                 |
| 15            | Swabi           | 72.619775 | 34.071273 | Grasses          | Maid Zaman       | 27-viii-2018              |

Table S12 Material examined for the morphometric analysis of *O. obesus* from the studied area during, 2016-19.

| S. no. | District | X         | Y         | Host food | Collector  | Date of collection |
|--------|----------|-----------|-----------|-----------|------------|--------------------|
| 1      | Haripur  | 72.566476 | 33.973733 | Acacia    | Maid Zaman | 10-v-2017          |
| 2      | Haripur  | 72.631004 | 33.950777 | Grasses   | Maid Zaman | 18-v-2017          |
| 3      | Haripur  | 72.688097 | 33.908004 | Acacia    | Maid Zaman | 18-v-2018          |
| 4      | Haripur  | 72.7921   | 34.078432 | Maize     | Maid Zaman | 18-v-2017          |
| 5      | Haripur  | 72.852503 | 33.896306 | Acacia    | Maid Zaman | 01-vi-2017         |
| 6      | Haripur  | 72.879956 | 33.850077 | Acacia    | Maid Zaman | 06-vi-2017         |
| 7      | Haripur  | 72.880792 | 33.846955 | Grasses   | Maid Zaman | 06-vi-2017         |
| 8      | Haripur  | 72.985807 | 33.801012 | Olive     | Maid Zaman | 04-vii-2018        |
| 9      | Haripur  | 73.124762 | 33.80939  | Pinus     | Maid Zaman | 04-vii-2018        |
| 10     | Haripur  | 73.181394 | 33.874276 | Shrubs    | Maid Zaman | 05-vii-2017        |
| 11     | Haripur  | 73.168568 | 33.953068 | Olive     | Maid Zaman | 06-vii-2018        |
| 12     | Haripur  | 73.136461 | 33.923888 | Pinus     | Maid Zaman | 20-vii-2018        |
| 13     | Haripur  | 72.970579 | 33.84812  | Dung      | Maid Zaman | 05-ix-2018         |
| 14     | Haripur  | 72.960861 | 33.907047 | Wheat     | Maid Zaman | 05-ix-2018         |
| 15     | Haripur  | 72.920586 | 33.90833  | Grasses   | Maid Zaman | 05-ix-2018         |
| 16     | Haripur  | 72.954676 | 33.928925 | Phulahi   | Maid Zaman | 04-iv-2017         |
| 17     | Haripur  | 72.975508 | 33.953475 | Wheat     | Maid Zaman | 18-iv-2017         |
| 18     | Haripur  | 72.929032 | 33.964939 | Grasses   | Maid Zaman | 29-v-2017          |
| 19     | Haripur  | 72.952602 | 34.082743 | Grasses   | Maid Zaman | 19-vi-2018         |
| 20     | Haripur  | 72.912832 | 34.269509 | Hop bush  | Maid Zaman | 8-viii-2018        |
| 21     | Haripur  | 72.959007 | 34.22306  | Dung      | Maid Zaman | 13-viii-2018       |
| 22     | Haripur  | 73.025483 | 33.94733  | Guava     | Maid Zaman | 10-viii-2018       |
| 23     | Buner    | 72.476074 | 34.189599 | Grasses   | Maid Zaman | 04-v-2016          |
| 24     | Buner    | 72.503138 | 34.190689 | Jujube    | Maid Zaman | 05-v-2016          |
| 25     | Buner    | 72.517072 | 34.22687  | Wood      | Maid Zaman | 30-v-2016          |
| 26     | Buner    | 72.603395 | 34.302386 | Maize     | Maid Zaman | 30-vii-2017        |

| S. no. | District | X         | Y         | Host food      | Collector  | Date of collection |
|--------|----------|-----------|-----------|----------------|------------|--------------------|
| 27     | Buner    | 72.489975 | 34.343447 | Jujube         | Maid Zaman | 30-vi-2016         |
| 28     | Buner    | 72.571884 | 34.391567 | Maize          | Maid Zaman | 19-ix-2016         |
| 29     | Buner    | 72.630004 | 34.389174 | Jujuba         | Maid Zaman | 19-ix-2017         |
| 30     | Buner    | 72.664832 | 34.413651 | Dung           | Maid Zaman | 17-vii-2016        |
| 31     | Buner    | 72.684593 | 34.374145 | Oranges        | Maid Zaman | 29-v-2017          |
| 32     | Buner    | 72.709915 | 34.40045  | Maize          | Maid Zaman | 30-v-2016          |
| 33     | Buner    | 72.499983 | 34.447829 | Maize          | Maid Zaman | 24-vii-2016        |
| 34     | Buner    | 72.485594 | 34.487095 | Jujube         | Maid Zaman | 21-vii-2016        |
| 35     | Buner    | 72.514634 | 34.570324 | Grasses        | Maid Zaman | 07-x-2016          |
| 36     | Buner    | 72.458983 | 34.488126 | Jujube         | Maid Zaman | 16-vii-2016        |
| 37     | Buner    | 72.364905 | 34.435525 | Eucalyptus     | Maid Zaman | 19-vii-2017        |
| 38     | Swabi    | 72.685544 | 34.11661  | Maize          | Maid Zaman | 05-v-2018          |
| 39     | Swabi    | 72.704853 | 34.139624 | Grasses        | Maid Zaman | 11-v-2018          |
| 40     | Swabi    | 72.560164 | 34.157049 | China berry    | Maid Zaman | 29-v-2018          |
| 41     | Swabi    | 72.581682 | 34.151207 | Oranges        | Maid Zaman | 17-ix-2017         |
| 42     | Swabi    | 72.583135 | 34.141526 | Oranges        | Maid Zaman | 30-ix-2018         |
| 43     | Swabi    | 72.604251 | 34.01644  | Acacia         | Maid Zaman | 14-viii-2019       |
| 44     | Swabi    | 72.554524 | 34.067817 | Wheat          | Maid Zaman | 16-vi-2018         |
| 45     | Swabi    | 72.501019 | 34.016208 | Rose sp.       | Maid Zaman | 23-vii-2019        |
| 46     | Swabi    | 72.408076 | 34.021332 | Maize          | Maid Zaman | 20-vii-2018        |
| 47     | Swabi    | 72.330368 | 34.00201  | Jujube         | Maid Zaman | 22-vii-2019        |
| 48     | Swabi    | 72.32994  | 34.043377 | Paper mulberry | Maid Zaman | 17-vi-2018         |
| 49     | Swabi    | 72.393493 | 34.060452 | Grasses        | Maid Zaman | 19-vii-2019        |
| 50     | Swabi    | 72.384956 | 34.104299 | Wheat          | Maid Zaman | 19-vii-2019        |
| 51     | Swabi    | 72.346565 | 34.085261 | Dung           | Maid Zaman | 13-vi-2018         |
| 52     | Swabi    | 72.284307 | 34.126975 | Stubbles       | Maid Zaman | 17-v-2018          |
| 53     | Swabi    | 72.352052 | 34.208843 | Wood           | Maid Zaman | 16-vii-2018        |
| 54     | Swabi    | 72.435991 | 34.172798 | White mulberry | Maid Zaman | 19-viii-2019       |

| S. no. | District | X         | Y         | Host food | Collector  | Date of collection |
|--------|----------|-----------|-----------|-----------|------------|--------------------|
| 55     | Swabi    | 72.388513 | 34.325003 | Wood      | Maid Zaman | 27-ix-2019         |
| 56     | Swabi    | 72.485745 | 34.089993 | Acacia    | Maid Zaman | 17-x-2019          |

Table S13 Material examined for the morphometric analysis of *O. horai* from the studied area during, 2016-19.

| S. no. | District | X         | Y        | Host food        | Collector  | Date of collection |
|--------|----------|-----------|----------|------------------|------------|--------------------|
| 1      | Haripur  | 72.873311 | 33.79535 | Shrubs           | Maid Zaman | 10-vi-2017         |
| 2      | Haripur  | 72.966911 | 33.88017 | Wild pomegranate | Maid Zaman | 30-vii-2017        |

#### Sequence alignments

##### *O. parvidens:*

The reference sequence of *O. longignathus* (NC\_034130.1) was aligned with our sequence showing 97% identity. But when top match sequence (MH557840.1) of BLAST retrieved from the NCBI was again aligned with the refseq of *O. longignathus* (NC\_034130.1), it resulted in a 96.03% identity match, indicating novel sequence (Figures S1 and S2.

| Score          | Expect                                                        | Identities   | Gaps      | Strand    |
|----------------|---------------------------------------------------------------|--------------|-----------|-----------|
| 1048 bits(567) | 0.0                                                           | 611/633(97%) | 0/633(0%) | Plus/Plus |
| Query 3110     | CTAAACTTGAGTCTCCAAGACAGAGCATCACCAATCATAGAACAACTAATCTTCTTCCAC  | 3169         |           |           |
| Sbjct 1        | .....C.....                                                   | 60           |           |           |
| Query 3170     | GACCATGCCCTAATAATCATACTAATAATCATCACCACAGTTATATACACAATAACCAGA  | 3229         |           |           |
| Sbjct 61       | .....C.....T.....T.....                                       | 120          |           |           |
| Query 3230     | ATTATTCAAATAAAACAAACCAGCCGATTATCCTAGAGGCCAAATAATTGAGACCCTC    | 3289         |           |           |
| Sbjct 121      | ..C.....C.....                                                | 180          |           |           |
| Query 3290     | TGAACCATTCGACCCAGCAATCATCCTGGTATTCATTGCAATACCATCCCTCCGATTACTT | 3349         |           |           |
| Sbjct 181      |                                                               | 240          |           |           |
| Query 3350     | TACCTAATAGACGAAGTACACAACCCAACCCTAACACTAAAAGCAGTAGGACATCAATGA  | 3409         |           |           |
| Sbjct 241      | .....T.....C.....                                             | 300          |           |           |
| Query 3410     | TACTGAAGCTACGAATACTCAGACTTTACAAAAGTAGAATTCGATTATACATAACACAA   | 3469         |           |           |
| Sbjct 301      | .....T.....T..C.....                                          | 360          |           |           |
| Query 3470     | GAACAGCAAGCAAGCACATTTTCGGCTCCTAGATACAGACAACCGAATTGTCTACCAATA  | 3529         |           |           |
| Sbjct 361      | .....A..GA.....C.....T.....                                   | 420          |           |           |
| Query 3530     | AACTACCAACCCGAATAATTGTTACAGCAGCAGATGTACTGCATTTCGTGAACAGTACCA  | 3589         |           |           |
| Sbjct 421      | .....C.....                                                   | 480          |           |           |
| Query 3590     | AGACTAGGAGTAAAAACAGATGCCACCCAGGACGGTTAAATCAAGTCAGATTCTCAATC   | 3649         |           |           |
| Sbjct 481      | .....C.....AC.....                                            | 540          |           |           |
| Query 3650     | AACCGACCTGGAATTCTATACGGGCAATGCTCAGAAATCTGTGGAGCAAACCACAGATT   | 3709         |           |           |
| Sbjct 541      | .....C.....C                                                  | 600          |           |           |
| Query 3710     | ATACCGATTATAATCGAAAGAGTAACCACAAAC                             | 3742         |           |           |
| Sbjct 601      |                                                               | 633          |           |           |

Figure S1 Alignment of the *O. parvidens* (sbjct) with the NC\_034130.1 (Query) (NCBI curated refseq of *O. longinathus*).

| Score          | Expect                                                        | Identities   | Gaps      | Strand    |
|----------------|---------------------------------------------------------------|--------------|-----------|-----------|
| 1190 bits(644) | 0.0                                                           | 702/731(96%) | 0/731(0%) | Plus/Plus |
| Query 3059     | GCTCCATGAATAAAGTTTTTAACCTTCATTAGAACAAAAATGGCAACATGACTAAACTTG  | 3118         |           |           |
| Sbjct 1        | .....A.....C..                                                | 60           |           |           |
| Query 3119     | AGTCTCCAAGACAGAGCATCACCAATCATAGAACAACATACTCTTCCACGACCATGCC    | 3178         |           |           |
| Sbjct 61       | .....G.....C...                                               | 120          |           |           |
| Query 3179     | CTAATAATCATACTAATAATCATCACCACAGTTATATACACAATAACCAGAATTATTCAA  | 3238         |           |           |
| Sbjct 121      | .....T.....C.....                                             | 180          |           |           |
| Query 3239     | AATAAACAAACCAGCCGATTTCATCCTAGAAGGCCAAATAATTGAGACCTCTGAACCATT  | 3298         |           |           |
| Sbjct 181      | .....T.....T.....C                                            | 240          |           |           |
| Query 3299     | GCACCAGCAATCATCTGGTATTTCATTGCAATACCATCCCTCCGATTACTTTACCTAATA  | 3358         |           |           |
| Sbjct 241      | ..G.....C.....                                                | 300          |           |           |
| Query 3359     | GACGAAGTACACAACCCCAACCTAACACTAAAAGCAGTAGGACATCAATGATACTGAAGC  | 3418         |           |           |
| Sbjct 301      | .....G...G.....C.....                                         | 360          |           |           |
| Query 3419     | TACGAATACTCAGACTTTACAAAACAGAAATTCGATTTCATACATAACACAAGAAGACGAA | 3478         |           |           |
| Sbjct 361      | ..T.....T..C.....                                             | 420          |           |           |
| Query 3479     | GCAAGCACATTTTCGGCTCCTAGATACAGACAACCGAATTGTCTTACCAATAAACTCACCA | 3538         |           |           |
| Sbjct 421      | A..GA.....C.....C.....T.....T.....                            | 480          |           |           |
| Query 3539     | ACCCGAATAATTGTTACAGCAGCAGATGTACTGCATTGTCGTAACAGTACCAAGACTAGGA | 3598         |           |           |
| Sbjct 481      | .....A.....                                                   | 540          |           |           |
| Query 3599     | GTAAAAACAGATGCCACCCAGGACGGTTAAATCAAGTCAGATTCTCAATCAACCGACCT   | 3658         |           |           |
| Sbjct 541      | .....C.....AC.....                                            | 600          |           |           |
| Query 3659     | GGAATTCTATACGGGCAATGCTCAGAAATCTGTGGAGCAAACACAGATTTATACCGATT   | 3718         |           |           |
| Sbjct 601      | .....C.....                                                   | 660          |           |           |
| Query 3719     | ATAATCGAAAGAGTAACCACAAACAAATTCATTAATTGAATCTCAAAGATAAGAGAATCA  | 3778         |           |           |
| Sbjct 661      | .....                                                         | 720          |           |           |
| Query 3779     | TCAGATGACTG                                                   | 3789         |           |           |
| Sbjct 721      | .....                                                         | 731          |           |           |

Figure S2. Alignment of the MH557840.1 (sbjct) with the NC\_034130.1 (Query) (NCBI curated refseq of *O. longinathus*).

#### *O. assmuthi*:

In the absence of refseq for *O. assmuthi*, a refseq (NC\_034027.1) of *O. obesus* curated by NCBI was manually retrieved followed by alignment in the online BLAST search with our sequence. The resulting alignment is presented in Figure S3, showing 95.6% identity match to the refseq (NC\_034027.1). For further justification, top matches accessions no. KP864045.1 (*O. obesus*); KP864044.1 (*O. obesus*); MN913606.1 (*Odontotermes* sp.); MH557841.1 (*O. obesus*) were aligned with refseq (NC\_034027.1) *O. obesus*, which resulted in to 95.16%, 95.48%, 96.77% and 96.07% identity matches, respectively (Figures S4-S7).



| Score         | Expect                                                       | Identities   | Gaps      | Strand    |
|---------------|--------------------------------------------------------------|--------------|-----------|-----------|
| 876 bits(474) | 0.0                                                          | 522/546(96%) | 0/546(0%) | Plus/Plus |
| Query 3130    | ACAGAGCATCACCAATTATAGAACAACCTAATCTTCTCCACGACCATGCTCTAATAATCA | 3189         |           |           |
| Sbjct 1       | .....C.....C.....                                            | 60           |           |           |
| Query 3190    | TACTAATAATCATCACCACAGTTATGTATACAATAACCAGAATCATTCAAAATAAACAAA | 3249         |           |           |
| Sbjct 61      | .....C.....T.....                                            | 120          |           |           |
| Query 3250    | CCAGCCGATTTCCTAGAGGGCCAAATAATTGAAACCTCTGAACCATCGCTCCAGCAA    | 3309         |           |           |
| Sbjct 121     | .....A.....C.....A.....                                      | 180          |           |           |
| Query 3310    | TCATCTTGGTATTCATTGCAATACCATCTCTCCGTCTACTCTACCTAATAGATGAAGTAC | 3369         |           |           |
| Sbjct 181     | .....C.....T.....                                            | 240          |           |           |
| Query 3370    | ACAACCCAGCACTAACACTAAAAGCAGTAGGACACCAATGATATTGAAGCTATGAATACT | 3429         |           |           |
| Sbjct 241     | .....T.....G.....G.....G.....C.....                          | 300          |           |           |
| Query 3430    | CAGACTTCACAAAAC TAGAATTGACTCATACATAACGCAAGAACAACAAGCAGACACAT | 3489         |           |           |
| Sbjct 301     | .....A.....                                                  | 360          |           |           |
| Query 3490    | TCCGTCTACTAGACACAGACAACCGAATCGTACTACCAATAAACTCACCAACACGAATAA | 3549         |           |           |
| Sbjct 361     | ...C..C.....C.....                                           | 420          |           |           |
| Query 3550    | TCGTTACAGCAGCAGCGTACTGCACTCATGAACAGTACCAAGACTAGGAGTGAAAACAG  | 3609         |           |           |
| Sbjct 421     | .T.....A.....C.....                                          | 480          |           |           |
| Query 3610    | ATGCCACCCCAGGACGACTAAATCAAGTAAGATTCTCAATCAACCGACCTGGAATTCTAT | 3669         |           |           |
| Sbjct 481     | .....C.....G...T...                                          | 540          |           |           |
| Query 3670    | ACGGGC                                                       | 3675         |           |           |
| Sbjct 541     | .....                                                        | 546          |           |           |

Figure S3. Alignment of the *O. assmuthi* (sbjct) with the NC\_034027.1 (Query) (NCBI curated refseq of *O. obesus*).

| Score          | Expect                                                       | Identities   | Gaps      | Strand    |
|----------------|--------------------------------------------------------------|--------------|-----------|-----------|
| 1013 bits(548) | 0.0                                                          | 610/641(95%) | 0/641(0%) | Plus/Plus |
| Query 3129     | GACAGAGCATCACCAATTATAGAACAACCTAATCTTCTCCACGACCATGCTCTAATAATC | 3188         |           |           |
| Sbjct 1        | .....C.....C.....                                            | 60           |           |           |
| Query 3189     | ATACTAATAATCATCACCACAGTTATGTATACAATAACCAGAATCATTCAAAATAAACAA | 3248         |           |           |
| Sbjct 61       | .....C.....T.....                                            | 120          |           |           |
| Query 3249     | ACCAGCCGATTTCCTAGAGGGCCAAATAATTGAAACCTCTGAACCATCGCTCCAGCA    | 3308         |           |           |
| Sbjct 121      | .....A.....C.....C.....A.....                                | 180          |           |           |
| Query 3309     | ATCATCTTGGTATTCATTGCAATACCATCTCTCCGTCTACTCTACCTAATAGATGAAGTA | 3368         |           |           |
| Sbjct 181      | .....C.....T.....                                            | 240          |           |           |
| Query 3369     | CACAACCCAGCACTAACACTAAAAGCAGTAGGACACCAATGATATTGAAGCTATGAATAC | 3428         |           |           |
| Sbjct 241      | .....T.....G.....G.....G.....C..C..C.....                    | 300          |           |           |
| Query 3429     | TCAGACTTCACAAAAC TAGAATTGACTCATACATAACGCAAGAACAACAAGCAGACACA | 3488         |           |           |
| Sbjct 301      | .....A.....                                                  | 360          |           |           |
| Query 3489     | TTCCGTCTACTAGACACAGACAACCGAATCGTACTACCAATAAACTCACCAACACGAATA | 3548         |           |           |
| Sbjct 361      | ...C..C.....C.....                                           | 420          |           |           |
| Query 3549     | ATCGTTACAGCAGCAGCGTACTGCACTCATGAACAGTACCAAGACTAGGAGTGAAAACA  | 3608         |           |           |
| Sbjct 421      | .T.....A.....C.....C.....                                    | 480          |           |           |
| Query 3609     | GATGCCACCCCAGGACGACTAAATCAAGTAAGATTCTCAATCAACCGACCTGGAATTCTA | 3668         |           |           |
| Sbjct 481      | .....C.....C.....G...T...                                    | 540          |           |           |
| Query 3669     | TACGGGCAATGCTCAGAAATCTGTGGAGCAAACCACAGATTATACCGATTACAATCGAA  | 3728         |           |           |
| Sbjct 541      | .....T.....                                                  | 600          |           |           |
| Query 3729     | AGAGTAACCACAAACAAATTCATTAATTGAATCTCAAAGAT                    | 3769         |           |           |
| Sbjct 601      | .....C.....                                                  | 641          |           |           |

Figure S4. Alignment of the KP864045.1 (*O. obesus*) (sbjct) with the NC\_034027.1 (Query)  
(NCBI curated refseq of *O. obesus*).

| Score          | Expect                                                       | Identities   | Gaps      | Strand    |
|----------------|--------------------------------------------------------------|--------------|-----------|-----------|
| 1024 bits(554) | 0.0                                                          | 612/641(95%) | 0/641(0%) | Plus/Plus |
| Query 3129     | GACAGAGCATCACCAATTATAGAACAACTAATCTTCTTCCACGACCATGCTCTAATAATC | 3188         |           |           |
| Sbjct 1        | .....C.....C.....                                            | 60           |           |           |
| Query 3189     | ATACTAATAATCATCACCAAGTTATGTATACAATAACCAAGATCATTCAAATAAACAA   | 3248         |           |           |
| Sbjct 61       | .....C.....T.....                                            | 120          |           |           |
| Query 3249     | ACCAGCCGATTATCTAGAGGGCCAAATAATTGAAACCTCTGAACCATCGCTCCAGCA    | 3308         |           |           |
| Sbjct 121      | .....A.....C.....A.....                                      | 180          |           |           |
| Query 3309     | ATCATCTTGGTATTCATTGCAATACCATCTCTCCGTCTACTCTACCTAATAGATGAAGTA | 3368         |           |           |
| Sbjct 181      | .....C.....T.....                                            | 240          |           |           |
| Query 3369     | CACAACCCAGCACTAACACTAAAAGCAGTAGGACACCAATGATATTGAAGCTATGAATAC | 3428         |           |           |
| Sbjct 241      | .....G.....G.....C.....C.....C.....                          | 300          |           |           |
| Query 3429     | TCAGACTTCACAAAAC TAGAATTTGACTCATAACGCAAGAACAACAAGCAGACACA    | 3488         |           |           |
| Sbjct 301      | .....A.....                                                  | 360          |           |           |
| Query 3489     | TTCCGTCTACTAGACACAGACAACCGAATCGTACTACCAATAAACTCACCAACACGAATA | 3548         |           |           |
| Sbjct 361      | .....C..C.....T.....C.....                                   | 420          |           |           |
| Query 3549     | ATCGTTACAGCAGCAGACGTACTGCACTCATGAACAGTACCAAGACTAGGAGTGAAAACA | 3608         |           |           |
| Sbjct 421      | ..T.....A.....C..C.....                                      | 480          |           |           |
| Query 3609     | GATGCCACCCAGGACGACTAAATCAAGTAAGATTCTCAATCAACCGACCTGGAATTCTA  | 3668         |           |           |
| Sbjct 481      | .....C.....C.....G...T...                                    | 540          |           |           |
| Query 3669     | TACGGGCAATGCTCAGAAATCTGTGGAGCAAACCACAGATTCATACCGATTACAATCGAA | 3728         |           |           |
| Sbjct 541      | .....T.....                                                  | 600          |           |           |
| Query 3729     | AGAGTAACCACAAACAAATTCATTAATTGAATCTCAAAGAT                    | 3769         |           |           |
| Sbjct 601      | .....C.....                                                  | 641          |           |           |

Figure S5. Alignment of the KP864044.1 (*O. obesus*) (sbjct) with the NC\_034027.1 (Query)  
(NCBI curated refseq of *O. obesus*).

| Score          | Expect | Identities                                                   | Gaps      | Strand    |      |
|----------------|--------|--------------------------------------------------------------|-----------|-----------|------|
| 1240 bits(671) | 0.0    | 719/743(97%)                                                 | 0/743(0%) | Plus/Plus |      |
| Query          | 3058   | AAGCTCCATGAATAAAGTTTTAACTTTCATTAGAACCAAAATGACAACATGACTAAACC  |           |           | 3117 |
| Sbjct          | 1      | .....                                                        |           |           | 60   |
| Query          | 3118   | TAAGACTTCAAGACAGAGCATCACCAATTATAGAACAATAATCTTCTCCACGACCATG   |           |           | 3177 |
| Sbjct          | 61     | .....                                                        |           |           | 120  |
| Query          | 3178   | CTCTAATAATCATACTAATAATCATCACCACAGTTATGTATACAATAACCAGAATCATT  |           |           | 3237 |
| Sbjct          | 121    | .C.....T.....                                                |           |           | 180  |
| Query          | 3238   | AAAATAAACAAACCAGCCGATTATCCTAGAGGGCCAAATAATTGAAACCTCTGAACCA   |           |           | 3297 |
| Sbjct          | 181    | .....A.....                                                  |           |           | 240  |
| Query          | 3298   | TCGCTCCAGCAATCATCTTGGTATTCAATGCAATCATCTCTCCGTCTACTCTACCTAA   |           |           | 3357 |
| Sbjct          | 241    | ....A.....C.....T.....                                       |           |           | 300  |
| Query          | 3358   | TAGATGAAGTACACAACCCAGCACTAACACTAAAAGCAGTAGGACACCAATGATATTGAA |           |           | 3417 |
| Sbjct          | 301    | .....G.....T.....G.....C.....                                |           |           | 360  |
| Query          | 3418   | GCTATGAATACTCAGACTTCACAAAACAGAAATTTGACTCATACATAACGCAAGAACAAC |           |           | 3477 |
| Sbjct          | 361    | .....A.....                                                  |           |           | 420  |
| Query          | 3478   | AAGCAGACACATTCCGTCTACTAGACACAGACAACCGAATCGTACTACCAATAAACTCAC |           |           | 3537 |
| Sbjct          | 421    | .....C.C.....T.....                                          |           |           | 480  |
| Query          | 3538   | CAACACGAATAATCGTTACAGCAGCAGACTGCACTCATGAACAGTACCAAGACTAG     |           |           | 3597 |
| Sbjct          | 481    | ....C.....A.....T.....                                       |           |           | 540  |
| Query          | 3598   | GAGTGAAAACAGATGCCACCCAGGACGACTAAATCAAGTAAGATTCTCAATCAACCGAC  |           |           | 3657 |
| Sbjct          | 541    | .....C.....                                                  |           |           | 600  |
| Query          | 3658   | CTGGAATTCTATACGGGCAATGCTCAGAAATCTGTGGAGCAAACACAGATTCATACCGA  |           |           | 3717 |
| Sbjct          | 601    | ....G...T.....T.....                                         |           |           | 660  |
| Query          | 3718   | TTACAATCGAAAGAGTAACCACAAACAAATTCATTAATTGAATCTCAAAGATAAGAGAAT |           |           | 3777 |
| Sbjct          | 661    | .....G.....                                                  |           |           | 720  |
| Query          | 3778   | CATCAGATGACTGAAAGCAAGTA                                      | 3800      |           |      |
| Sbjct          | 721    | .....                                                        | 743       |           |      |

Figure S6. Alignment of the MN913606.1 (*Odontotermes sp.*) (sbjct) with the NC\_034027.1 (Query) (NCBI curated refseq of *O. obesus*).

| Score          | Expect                                                       | Identities   | Gaps                       | Strand              |
|----------------|--------------------------------------------------------------|--------------|----------------------------|---------------------|
| 1245 bits(674) | 0.0                                                          | 734/764(96%) | 0/764(0%)                  | Plus/Plus           |
| Query 3037     | GCAGATAAGTGC                                                 | GGTGGATT     | TAAGCTCCATGAATAAAGTTTTTAAC | TTTCATTAGAACCA 3096 |
| Sbjct 1        | .....AT.                                                     | .....        | .....                      | 60                  |
| Query 3097     | AAATGACAACATGACTAAACCTAAGACTTCAAGACAGAGCATCACCAATTATAGAACAAC | 3156         |                            |                     |
| Sbjct 61       | .....C.                                                      | .....        | .....                      | 120                 |
| Query 3157     | TAATCTTCTTCCACGACCATGCTCTAATAATCATACTAATAATCATCACCACAGTTATGT | 3216         |                            |                     |
| Sbjct 121      | .....C.                                                      | .....        | .....                      | 180                 |
| Query 3217     | ATACAATAACCAGAATCATTCAAATAAACAAACCAGCCGATTTCCTAGAGGGCCAAA    | 3276         |                            |                     |
| Sbjct 181      | .C.....T.....C.....A.....                                    | 240          |                            |                     |
| Query 3277     | TAATTGAAACCTCTGAACCATCGCTCCAGCAATCATCTTGGTATTGCAATACCAT      | 3336         |                            |                     |
| Sbjct 241      | .....A.....C.....                                            | 300          |                            |                     |
| Query 3337     | CTCTCCGTCTACTCTACCTAATAGATGAAGTACACAACCCAGCACTAACACTAAAAGCAG | 3396         |                            |                     |
| Sbjct 301      | .C.....T.....G.....T.....G....                               | 360          |                            |                     |
| Query 3397     | TAGGACACCAATGATATTGAAGCTATGAATACTCAGACTTCACAAACTAGAATTTGACT  | 3456         |                            |                     |
| Sbjct 361      | .....C.....                                                  | 420          |                            |                     |
| Query 3457     | CATACATAACGCAAGAACAACAAGCAGACACATTCGGTCTACTAGACACAGACAACCGAA | 3516         |                            |                     |
| Sbjct 421      | .....A.....C..C.....                                         | 480          |                            |                     |
| Query 3517     | TCGTACTACCAATAAACTCACCAACACGAATAATCGTTACAGCAGCAGCGTACTGCACT  | 3576         |                            |                     |
| Sbjct 481      | .....C.....A....                                             | 540          |                            |                     |
| Query 3577     | CATGAACAGTACCAAGACTAGGAGTGAAAACAGATGCCACCCAGGACGACTAAATCAAG  | 3636         |                            |                     |
| Sbjct 541      | .....C.....C..T.....C.....                                   | 600          |                            |                     |
| Query 3637     | TAAGATTCTCAATCAACCGACCTGGAATTCTATACGGGCAATGCTCAGAAATCTGTGGAG | 3696         |                            |                     |
| Sbjct 601      | .C.....G.....T.....C.....                                    | 660          |                            |                     |
| Query 3697     | CAAACCACAGATTACATCCGATTACAATCGAAAGAGTAACCACAAACAAATTCATTAATT | 3756         |                            |                     |
| Sbjct 661      | ....T.....                                                   | 720          |                            |                     |
| Query 3757     | GAATCTCAAAGATAAGAGAATCATCAGATGACTGAAAGCAAGTA                 | 3800         |                            |                     |
| Sbjct 721      | .....                                                        | 764          |                            |                     |

Figure S7 Alignment of the MH557841.1 (*O. obesus*) (sbjct) with the NC\_034027.1 (Query) (NCBI curated refseq of *O. obesus*).

### *O. obesus*:

Refseq (NC\_034027.1) aligned with our sequence are presented in Figure S8 showed 100% match confirming the morphological identification of the species *O. obesus*.

| Score          | Expect | Identities                                                   | Gaps      | Strand    |
|----------------|--------|--------------------------------------------------------------|-----------|-----------|
| 1120 bits(606) | 0.0    | 606/606(100%)                                                | 0/606(0%) | Plus/Plus |
| Query 3139     |        | CACCAATTATAGAACAATAATCTTCTTCCACGACCATGCTCTAATAATCATACTAATAA  |           | 3198      |
| Sbjct 1        |        | .....                                                        |           | 60        |
| Query 3199     |        | TCATCACCACAGTTATGTATACAATAACCAGAATCATTCAAAATAAACAAACCAGCCGAT |           | 3258      |
| Sbjct 61       |        | .....                                                        |           | 120       |
| Query 3259     |        | TCATCCTAGAGGGCCAAATAATTGAAACCTCTGAACCATCGCTCCAGCAATCATCTTGG  |           | 3318      |
| Sbjct 121      |        | .....                                                        |           | 180       |
| Query 3319     |        | TATTCATTGCAATACCATCTCTCCGTCTACTCTACCTAATAGATGAAGTACACAACCCAG |           | 3378      |
| Sbjct 181      |        | .....                                                        |           | 240       |
| Query 3379     |        | CACTAACTAAAAGCAGTAGGACACCAATGATATTGAAGCTATGAATACTCAGACTTCA   |           | 3438      |
| Sbjct 241      |        | .....                                                        |           | 300       |
| Query 3439     |        | CAAACTAGAAATTTGACTCATACATAACGCAAGAACAACAAGCAGACACATTCCGTCTAC |           | 3498      |
| Sbjct 301      |        | .....                                                        |           | 360       |
| Query 3499     |        | TAGACACAGACAACCGAATCGTACTACCAATAAACTCACCAACACGAATAATCGTTACAG |           | 3558      |
| Sbjct 361      |        | .....                                                        |           | 420       |
| Query 3559     |        | CAGCAGACGTACTGCACTCATGAACAGTACCAAGACTAGGAGTGAAAACAGATGCCACCC |           | 3618      |
| Sbjct 421      |        | .....                                                        |           | 480       |
| Query 3619     |        | CAGGACGACTAAATCAAGTAAGATTCTCAATCAACCGACCTGGAATTCTATACGGGCAAT |           | 3678      |
| Sbjct 481      |        | .....                                                        |           | 540       |
| Query 3679     |        | GCTCAGAAATCTGTGGAGCAAACCACAGATTCATACCGATTACAATCGAAAGAGTAACCA |           | 3738      |
| Sbjct 541      |        | .....                                                        |           | 600       |
| Query 3739     | 3744   | CAAACA                                                       |           |           |
| Sbjct 601      | 606    | .....                                                        |           |           |

Figure S8. Alignment of the *O. obesus* (sbjct) with the NC\_034027.1 (Query) (NCBI curated refseq of *O. obesus*).

### *O. horai*

To check the novelty of current sequence and validity of the matched taxon and in the absence of refseq for *O. horai*, a refseq (NC\_034027.1) of *O. obesus* curated by NCBI was manually retrieved followed by alignment in the online BLAST search with our sequence. The resulting alignment is presented in Figure S9, showing 98.22% identity match to refseq (NC\_034027.1), implying that our sequences are not homologues to *O. obesus*.

| Score         | Expect                                                       | Identities   | Gaps      | Strand    |
|---------------|--------------------------------------------------------------|--------------|-----------|-----------|
| 881 bits(477) | 0.0                                                          | 496/505(98%) | 2/505(0%) | Plus/Plus |
| Query 3156    | CTAATCTTCTCCACGACCATGCTCTAATAATCATACTAATAATCATCACACAGTTATG   | 3215         |           |           |
| Sbjct 3       | .....G.....                                                  | 62           |           |           |
| Query 3216    | TATACAATAACCAGAATCATTCAAAATAAACAAACCAGCCGATTCATCCTAGAGGGCCAA | 3275         |           |           |
| Sbjct 63      | .....-.....                                                  | 121          |           |           |
| Query 3276    | ATAATTGAAACCTCTGAACCATCGCTCCAGCAATCATCTTGGTATTCATTGCAATACCA  | 3335         |           |           |
| Sbjct 122     | ...G.....-.....                                              | 180          |           |           |
| Query 3336    | TCTCTCCGTCTACTCTACCTAATAGATGAAGTACACAACCCAGCACTAACACTAAAAGCA | 3395         |           |           |
| Sbjct 181     | .....                                                        | 240          |           |           |
| Query 3396    | GTAGGACACCAATGATATTGAAGCTATGAATACTCAGACTTCACAAACTAGAATTTGAC  | 3455         |           |           |
| Sbjct 241     | ...C.....C.....                                              | 300          |           |           |
| Query 3456    | TCATACATAACGCAAGAACAACAAGCAGACACATTCGGTCTACTAGACACAGACAACCGA | 3515         |           |           |
| Sbjct 301     | .....A.....                                                  | 360          |           |           |
| Query 3516    | ATCGTACTACCAATAAACTCACCAACACGAATAATCGTTACAGCAGCAGACGTACTGCAC | 3575         |           |           |
| Sbjct 361     | .....G.....                                                  | 420          |           |           |
| Query 3576    | TCATGAACAGTACCAAGACTAGGAGTGAAAACAGATGCCACCCAGGACGACTAAATCAA  | 3635         |           |           |
| Sbjct 421     | .....G.....                                                  | 480          |           |           |
| Query 3636    | GTAAGATTCTCAATCAACCGACCTG                                    | 3660         |           |           |
| Sbjct 481     | .....                                                        | 505          |           |           |

Figure S9. Alignment of the *O. horai* (sbjct) with the NC\_034027.1 (Query) (NCBI curated refseq of *O. obesus*).
